## Mapping the corticoreticular pathway from cortex-wide anterograde axonal tracing in the mouse

Pierce Boyne, PT, DPT, PhD, NCS;<sup>1</sup> Oluwole O. Awosika, MD, MS;<sup>2</sup> Yu Luo, PhD<sup>3</sup>

<sup>1</sup>Department of Rehabilitation, Exercise and Nutrition Sciences, College of Allied Health Sciences, University of Cincinnati, Cincinnati, OH, 45267, USA

<sup>2</sup>Department of Neurology and Rehabilitation Medicine, College of Medicine, University of Cincinnati, Cincinnati, OH, 45267, USA

<sup>3</sup>Department of Molecular Genetics, Biochemistry and Microbiology, College of Medicine, University of Cincinnati, Cincinnati, OH, 45267, USA

**Key words:** motor activity, locomotion, postural balance, pyramidal tracts, extrapyramidal tracts, brain mapping

**Grant support:** PB is supported by NIH grant R01HD093694. OOA is supported by an American Academy of Neurology Career Development Award. YL is supported by NIH grant R01NS107365.

**Corresponding author:**

Pierce Boyne, PT, DPT, PhD, NCS  
Health Sciences Building, room 267  
3225 Eden Ave.  
Cincinnati, OH, 45267-0394  
[Pierce.Boyne@uc.edu](mailto:Pierce.Boyne@uc.edu)  
513-558-7499 (phone); 513-558-7474 (fax)

1 **ABSTRACT**

2           The corticoreticular pathway (CRP) has been implicated as an important mediator of  
3 motor recovery and rehabilitation after central nervous system damage. However, its origins,  
4 trajectory and laterality are not well understood. This study mapped the mouse CRP in  
5 comparison with the corticospinal tract (CST). We systematically searched the Allen Mouse  
6 Brain Connectivity Atlas (© 2011 Allen Institute for Brain Science) for experiments that used  
7 anterograde tracer injections into the right isocortex in mice. For each eligible experiment  
8 (N=607), CRP and CST projection strength were quantified by the tracer volume reaching the  
9 reticular formation motor nuclei ( $RF_{motor}$ ) and pyramids respectively. Tracer density in each brain  
10 voxel was also correlated with  $RF_{motor}$  versus pyramids projection strength to explore the relative  
11 trajectories of the CRP and CST. We found significant CRP projections originating from the  
12 primary and secondary motor cortices, anterior cingulate, primary somatosensory cortex and  
13 medial prefrontal cortex. Compared with the CST, the CRP had stronger projections from each  
14 region except the primary somatosensory cortex. Ipsilateral projections were stronger than  
15 contralateral for both tracts (above the pyramidal decussation), but the CRP projected more  
16 bilaterally than the CST. The estimated CRP trajectory was anteromedial to the CST in the  
17 internal capsule and dorsal to the CST in the brainstem. Our findings reveal a widespread  
18 distribution of CRP origins and confirm strong bilateral CRP projections, theoretically increasing  
19 the potential for partial sparing after brain lesions and contralesional compensation after  
20 unilateral injury.

21

22

23 **SIGNIFICANCE**

24           The corticoreticular pathway (CRP) provides volitional input to brainstem nuclei that  
25 generate walking command signals, facilitate balance and direct limb movements. Upregulation  
26 of this pathway appears to be a central mechanism of movement recovery after brain and spinal  
27 cord injury, but its anatomy is not well understood. We showed that the mouse CRP originates  
28 from widespread parts of the cortex, including non-motor regions, that it projects strongly to both  
29 sides of the brainstem, and that its projections are more distributed and bilateral than the  
30 corticospinal tract. These findings suggest that the CRP may be particularly resilient to complete  
31 disruption.

32

33

## 34 INTRODUCTION

35           The reticulospinal tract is a major motor pathway that delivers the primary input to  
36 locomotion-generating circuits in the spinal cord, while also supporting anticipatory postural  
37 control and efficient motor synergies in the upper and lower limbs.(Brownstone and Chopek,  
38 2018; Matsuyama et al., 2004; Riddle et al., 2009) The corticoreticular pathway (CRP) provides  
39 volitional input to the reticulospinal system via direct and indirect projections from the cerebral  
40 cortex to the medial reticular formation motor nuclei (RF<sub>motor</sub>).(Fisher et al., 2021; Jinnai, 1984;  
41 Matsuyama et al., 2004) While the CRP has received much less attention than the more  
42 recently evolved corticospinal tract (CST),<sup>e.g.</sup>(Capaday et al., 1999; Dawes et al., 2008; Jayaram  
43 et al., 2012; Stinear et al., 2007) accumulating evidence in animal studies (including non-human  
44 primates) now indicates that the CRP is likely a critical mediator of motor recovery after central  
45 nervous system damage, that also mediates effects of rehabilitation.(Asboth et al., 2018; Darling  
46 et al., 2018; Glover and Baker, 2020; Ishida et al., 2019; Takase et al., 2017; Zaaime et al.,  
47 2012; Zaaime et al., 2018) However, the origins, trajectory and laterality of the CRP are not well  
48 understood.

49           In humans, white matter tracts like the CRP are typically mapped by simulating  
50 streamlines through pre-processed diffusion-weighted magnetic resonance images. While this  
51 method provides useful non-invasive, *in vivo* measures, it is limited by insufficient resolution to  
52 resolve axonal bundles and inability to determine the direction of neural conduction.(Calamante,  
53 2019) Consequently, it is crucial for diffusion tractography to be guided by anatomical  
54 knowledge in order to maximize tract coverage and minimize inclusion of false  
55 pathways.(Aydogan et al., 2018; Azadbakht et al., 2015; Gutierrez et al., 2020) Unfortunately,  
56 this anatomical knowledge is incomplete for the CRP, which limits confidence in prior human  
57 CRP mapping.

58           Most studies in humans and other animals have exclusively mapped CRP projections  
59 from the primary and secondary motor areas.(Asboth et al., 2018; Darling et al., 2018; Fisher et

60 al., 2021; Fregosi et al., 2017; He and Wu, 1985; Ishida et al., 2019; Jang and Lee, 2019;  
61 Jinnai, 1984; Kably and Drew, 1998a; Kably and Drew, 1998b; Lamas et al., 1994; Matsuyama  
62 et al., 2004; Pilyavsky, 1975; Schulz et al., 2017; Takase et al., 2017; Yeo et al., 2020)  
63 However, the extent of cortical inputs to the CRP has not been well defined, and there have  
64 been preliminary indications of potentially important CRP bundles originating from outside the  
65 motor cortex.(Keizer et al., 1989; Newman et al., 1989; Rho et al., 1997; Rossi and Brodal,  
66 1956; Shammah-Lagnado et al., 1987) For example, one anterograde axonal tracing study  
67 using wheat germ agglutinin-horseradish peroxidase (WGA-HRP) in the rat revealed dense  
68 RF<sub>motor</sub> projections from the anterior cingulate cortex (N=2) and medial prefrontal cortex  
69 (N=5).(Newman et al., 1989) Likewise, a classical retrograde tracing experiment using HRP or  
70 WGA-HRP injections into RF<sub>motor</sub> in rats (N=41) found that the strongest CRP projections  
71 originated from the anterior cingulate and medial prefrontal cortices.(Shammah-Lagnado et al.,  
72 1987) Such projections could be important because they may provide greater opportunity for  
73 CRP sparing after a brain lesion, and novel targets for neuromodulation. However, other small  
74 studies (N=2-14) using anterograde lesion degeneration mapping or classical retrograde tracer  
75 injections into the medial reticular formation in the cat or primate have only observed *either*  
76 anterior cingulate(Keizer et al., 1989) *or* medial prefrontal(Rho et al., 1997; Rossi and Brodal,  
77 1956) CRP origins, or neither.(Berrevoets and Kuypers, 1975; Keizer et al., 1984)

78         Uncertainty about the extent of CRP origins has also been compounded by the  
79 limitations of these prior tract tracing experiments testing the breadth of its inputs, which were all  
80 from the 20<sup>th</sup> century. Classical tracers commonly have spread from the injection site, non-  
81 specific cell labelling, bidirectional transport (anterograde and retrograde) and trans-synaptic  
82 travel, which could have led to false positives.(Saleeba et al., 2019) Likewise, false negatives  
83 may have occurred due to insufficient neuronal uptake or transport over long-range CRP  
84 axons,(Saleeba et al., 2019) a limited search window or a differing taxonomy of brain regions.  
85 Modern tract tracing methods are largely able to overcome these limitations,(Chamberlin et al.,

86 1998; Oh et al., 2014; Ragan et al., 2012; Saleeba et al., 2019; Wang et al., 2020) but the  
87 extent of cortical inputs to the CRP has not been previously assessed systematically with next-  
88 generation viral tracers or localization procedures.

89 In addition, the laterality of the CRP also remains incompletely understood. The CRP  
90 has been found to project bilaterally to RF<sub>motor</sub>,<sup>e.g.</sup>(Fisher et al., 2021; Fregosi et al., 2017; Kably  
91 and Drew, 1998; Matsuyama and Drew, 1997; Rho et al., 1997) which could have important  
92 implications for recovery from unilateral brain lesions.(Brownstone and Chopek, 2018; Jang and  
93 Lee, 2019; Takase et al., 2017) However, a paucity of studies have quantified the laterality of  
94 these projections,(Fisher et al., 2021; Kably and Drew, 1998; Rho et al., 1997) and those  
95 studies have only tested small numbers of neurons originating from restricted sites within the  
96 motor cortex,(Fisher et al., 2021; Kably and Drew, 1998) and/or have had relatively small  
97 sample sizes (N=4-14).(Fisher et al., 2021; Kably and Drew, 1998; Rho et al., 1997) A broader  
98 quantification of CRP lateralization would provide a better understanding of the proportion of  
99 contralateral projections available for compensation after unilateral brain injury.

100 The Allen Mouse Brain Connectivity Atlas(Oh et al., 2014) (© 2011 Allen Institute for  
101 Brain Science <http://connectivity.brain-map.org/>) provides a unique opportunity to address these  
102 knowledge gaps. This open data resource was generated from brain-wide projection mapping,  
103 using stereotaxic injections with enhanced green fluorescent protein (EGFP)-expressing adeno-  
104 associated viral vectors (rAAV2/1) for anterograde axonal labelling, with negligible retrograde  
105 transport.(Chamberlin et al., 1998) Serial two-photon tomography(Ragan et al., 2012) was then  
106 followed by spatial registration into a common three-dimensional reference space  
107 (CCFv3).(Wang et al., 2020) Labeled pixel volumes were quantified at the injection site and in  
108 bilateral atlas regions across the brain, including many specific reticular nuclei.(Oh et al., 2014)  
109 This resource has already made major contributions to our understanding of brain  
110 organization,(Oh et al., 2014) and it currently includes data from 2,994 anterograde tracer  
111 experiments, but it has not been previously used to evaluate the CRP. The current study

112 leveraged the Allen Connectivity Atlas to determine the location, extent and laterality of cortical  
113 inputs to the CRP in the mouse, while also mapping the cortical inputs to the CST for  
114 comparison. In addition, we used statistical methods developed for human brain imaging  
115 analysis to explore the trajectory of the CRP relative to the CST.

116

## 117 **METHODS AND MATERIALS**

### 118 **Data sources**

119 Anterograde tracer data were obtained from the Allen Mouse Brain Connectivity  
120 Atlas(Oh et al., 2014) (© 2011 Allen Institute for Brain Science [http://connectivity.brain-  
122 map.org/](http://connectivity.brain-<br/>121 map.org/)). The experimental procedures that produced this dataset are summarized in the  
122 introduction above and were approved by the Institutional Animal Care and Use Committee of  
123 the Allen Institute for Brain Science.(Oh et al., 2014) Experiments were performed on adult mice  
124 with injections at postnatal day 54-58 and euthanasia 21 days later followed by brain imaging  
125 and data processing.(Oh et al., 2014) Further details on the experimental procedures have been  
126 described in previous publication.(Oh et al., 2014) We also obtained reference anatomical data  
127 and brain region annotation labels from the Allen Mouse Brain Atlas(Sunkin et al., 2006) (©  
128 2004 Allen Institute for Brain Science <http://atlas.brain-map.org/>) in the CCFv3 reference space,  
129 from the Scalable Brain Atlas(Bakker et al., 2015)  
130 ([https://scalablebrainatlas.incf.org/mouse/ABA\\_v3](https://scalablebrainatlas.incf.org/mouse/ABA_v3)).

131

### 132 **Data selection & processing**

133 To identify all potentially eligible experiments in the connectivity atlas, we performed a  
134 'source search' for those that included injection into the cerebral isocortex using the anterograde  
135 EGFP tracer. The following link reproduces the search: [http://connectivity.brain-  
map.org/projection?searchMode=source&sourceDomain=315&primaryStructureOnly=true&trac  
ers=10&isi=false](http://connectivity.brain-<br/>136 map.org/projection?searchMode=source&sourceDomain=315&primaryStructureOnly=true&trac<br/>137 ers=10&isi=false). A 'target search' within those results was then performed to find experiments

138 where tracer was detected in one or more of the reticulospinal motor nuclei involved with limb  
139 movement (RF<sub>motor</sub>; Table 1; [http://connectivity.brain-](http://connectivity.brain-map.org/projection?searchMode=target&sourceDomain=315&primaryStructureOnly=true&tracer=s=10&isi=false&targetDomain=1048,307,938,970,978,852,395,1098,1107,136,1093,146,880,162,358,599626927&hemisphere=either&targetVolumeThreshold=0.0000)  
140 [map.org/projection?searchMode=target&sourceDomain=315&primaryStructureOnly=true&tracer](http://connectivity.brain-map.org/projection?searchMode=target&sourceDomain=315&primaryStructureOnly=true&tracer=s=10&isi=false&targetDomain=1048,307,938,970,978,852,395,1098,1107,136,1093,146,880,162,358,599626927&hemisphere=either&targetVolumeThreshold=0.0000)  
141 [s=10&isi=false&targetDomain=1048,307,938,970,978,852,395,1098,1107,136,1093,146,880,16](http://connectivity.brain-map.org/projection?searchMode=target&sourceDomain=315&primaryStructureOnly=true&tracer=s=10&isi=false&targetDomain=1048,307,938,970,978,852,395,1098,1107,136,1093,146,880,162,358,599626927&hemisphere=either&targetVolumeThreshold=0.0000)  
142 [2,358,599626927&hemisphere=either&targetVolumeThreshold=0.0000](http://connectivity.brain-map.org/projection?searchMode=target&sourceDomain=315&primaryStructureOnly=true&tracer=s=10&isi=false&targetDomain=1048,307,938,970,978,852,395,1098,1107,136,1093,146,880,162,358,599626927&hemisphere=either&targetVolumeThreshold=0.0000)).(Brownstone and  
143 Chopek, 2018)

144 <<< Insert Table 1 near here >>>

145 One experiment (ID: 249396394) was excluded because the injection site mapped to the  
146 superior colliculus (outside of the isocortex). We also restricted our analysis to injection  
147 experiments in the right hemisphere, because there was minimal coverage of non-visual regions  
148 in the left hemisphere. Since cortical layer 5 is the origin of corticofugal projection pathways like  
149 the CRP and CST,(Gerfen et al., 2018) we also excluded experiments that used transgenic  
150 mice with limited expression in layer 5, according to the documentation ([http://connectivity.brain-](http://connectivity.brain-map.org/transgenic)  
151 [map.org/transgenic](http://connectivity.brain-map.org/transgenic)). This meant that experiments using the following transgenic lines were  
152 excluded: Calb1-T2A-dgCre, Calb2-IRES-Cre, Cort-T2A-Cre, Crh-IRES-Cre<sub>BL</sub>, Ctgf-T2A-  
153 dgCre, Cux2-CreERT2, Cux2-IRES-Cre, Erbb4-T2A-CreERT2, Esr1-2A-Cre, Gad2-IRES-Cre,  
154 Grp-Cre<sub>KH288</sub>, Htr3a-Cre<sub>NO152</sub>, Nos1-CreERT2, Nr5a1-Cre, Ntsr1-Cre<sub>GN220</sub>, Oxtr-T2A-  
155 Cre, Penk-IRES2-Cre-neo, Pvalb-IRES-Cre, Slc18a2-Cre<sub>OZ14</sub>, Syt17-Cre<sub>NO14</sub> and Tac1-  
156 IRES2-Cre.

157 Included experiments used wild-type mice (C57BL/6J) or one of the following transgenic  
158 lines: A930038C07Rik-Tg1-Cre, Adcyap1-2A-Cre, Cart-Tg1-Cre, Chrna2-Cre<sub>OE25</sub>, Chrnb4-  
159 Cre<sub>OL57</sub>, Drd3-Cre<sub>KI196</sub>, Efr3a-Cre<sub>NO108</sub>, Etv1-CreERT2, Glt25d2-Cre<sub>NF107</sub>, Gnb4-  
160 IRES2-Cre, Gnb4-IRES2-CreERT2, Gng7-Cre<sub>KH71</sub>, Gpr26-Cre<sub>KO250</sub>, Grm2-Cre<sub>MR90</sub>,  
161 Htr2a-Cre<sub>KM207</sub>, Npr3-IRES2-Cre, Ntng2-IRES2-Cre, Oxtr-Cre<sub>ON66</sub>, Plxnd1-Cre<sub>OG1</sub>,  
162 Pvalb-T2A-CreERT2, Rasgrf2-T2A-dCre, Rbp4-Cre<sub>KL100</sub>, Rorb-IRES2-Cre, Rorb-IRES2-Cre-  
163 neo, Scnn1a-Tg3-Cre, Sepw1-Cre<sub>NP39</sub>, Sim1-Cre<sub>KJ18</sub>, Slc17a8-iCre, Slc17a8-IRES2-Cre,



164 Slc32a1-IRES-Cre, Sst-IRES-Cre, Syt6-Cre\_KI148, Tlx3-Cre\_PL56, Trib2-F2A-CreERT2, Vip-  
165 IRES-Cre.

166 The projection strength from each cortical injection site to RF<sub>motor</sub> was calculated by  
167 dividing the total volume of tracer-labelled pixels in RF<sub>motor</sub> by the injection site volume.(Oh et al.,  
168 2014) In a previous study that used this metric for other targets,(Oh et al., 2014) projection  
169 strength values  $\geq 10^{-3.5}$  ( $\sim 0.0003$ ) identified false axonal projections (primarily due to small  
170 segmentation artifacts) 14.5% of the time. At a higher threshold of 0.01, this false positive rate  
171 fell to  $\sim 0\%$ .(Oh et al., 2014)<sup>(extended Fig 7)</sup> Thus, we used the 0.01 threshold for descriptive  
172 statistics. We also separately calculated the strength of contralateral and ipsilateral projections  
173 after repeating the search with left and right sided RF<sub>motor</sub> targets, respectively. To identify CST  
174 projections for comparison, we repeated the above procedures with the medullary pyramids as  
175 the target structure ([http://connectivity.brain-  
176 map.org/projection?searchMode=target&sourceDomain=315&primaryStructureOnly=true&tracer  
177 s=10&isi=false&targetDomain=190&hemisphere=either&targetVolumeThreshold=0.0000](http://connectivity.brain-map.org/projection?searchMode=target&sourceDomain=315&primaryStructureOnly=true&tracer_s=10&isi=false&targetDomain=190&hemisphere=either&targetVolumeThreshold=0.0000)).

178 To visualize the results in brain-space, we generated an anatomical surface model of the  
179 right hemi-brain without the olfactory bulb in GIFTI format from the 0.025 mm isotropic  
180 resolution CCFv3 atlas (using MATLAB R2017a and Connectome Workbench v.1.4.2). We then  
181 mapped the injection coordinates to the nearest surface vertex and labelled a 0.1 mm radius  
182 circle around those coordinates with the projection strength values for that injection. We also  
183 mapped the CCFv3 atlas labels for cortical regions of interest (ROIs) to the surface model,  
184 including the anterior cingulate area, medial prefrontal areas (orbital, prelimbic, infralimbic and  
185 frontal pole), secondary motor area, primary motor area and primary somatosensory area.

186

## 187 **Data analysis**

188 Projection strength is not normally distributed and has a high frequency of zeros,(Oh et  
189 al., 2014) so nonparametric statistics were used for analysis. For each target (RF<sub>motor</sub> &

190 pyramids), projection strength was compared between cortical ROIs using Kruskal-Wallis  
191 ANOVA, followed by Mann-Whitney U pairwise comparisons with false discovery rate (FDR)  
192 correction(Benjamini and Hochberg, 1995) across ROIs. For each target, ipsilateral vs.  
193 contralateral projection strength was tested using Wilcoxon signed rank tests (paired by  
194 injection experiment). We also calculated a projection strength laterality index as: (ipsilateral –  
195 contralateral) / (ipsilateral + contralateral) \* 100, which ranges from -100 (completely  
196 contralateral) to 100 (completely ipsilateral), where 0 indicates bilateral symmetry. Between  
197 targets, projection strength was compared across all injection experiments, for each cortical  
198 ROI, for ipsilateral & contralateral projections and for the laterality index. These between-target  
199 analyses used Wilcoxon signed rank tests (paired by injection experiment) with separate FDR  
200 correction across ROIs or lateralities. R statistical software(R Development Core Team, 2004)  
201 v3.6.0 was used for analysis. The significance threshold was  $p_{FDR} < 0.05$ .

202

### 203 **Exploratory trajectory comparison analysis**

204 Presently, it is not possible to directly map the CRP trajectory from anterograde tracer  
205 experiments because injections that label CRP neurons likely also label neurons from other  
206 tracts. To address this issue, we performed an exploratory statistical analysis to identify brain  
207 voxels more likely to belong to CRP vs. CST projections. For each eligible injection experiment,  
208 we downloaded the 3-dimensional projection density image (at 0.05 mm isotropic resolution),  
209 which had been resampled to the CCFv3 atlas space.(Oh et al., 2014) Non-parametric  
210 permutation testing was then performed to test how strongly the projection density at each voxel  
211 was associated with the CRP vs. CST projection strength across injection experiments, while  
212 controlling for the total (whole-brain) projection strength of each experiment. This analysis used  
213 FSL randomise(Winkler et al., 2014) and threshold-free cluster enhancement(Smith and  
214 Nichols, 2009) with 5,000 permutations and a two-sided significance threshold of  $p_{FDR} < 0.05$ .  
215 Two-sided significance testing was performed by generating both contrast maps ( $RF_{motor} -$

216 pyramids and pyramids - RF<sub>motor</sub>), taking the minimum p-value in each voxel and multiplying it by  
217 two, then running FDR correction. For visualization, results were also projected onto the surface  
218 model of the right hemi-brain without the olfactory bulb.

219

## 220 **RESULTS**

221 There were 607 eligible experiments injecting anterograde EGFP tracer into the right  
222 isocortex, among which 360 (59.3%) used male mice and 316 (52.1%) involved injections in the  
223 ROIs (Fig 1).

224 <<< Insert Figure 1 near here >>>

225 The proportion of cortical injections with RF<sub>motor</sub> projection strengths  $\geq 0.01$  was 55.8%  
226 overall (Fig 2). Within the anterior cingulate, medial prefrontal, secondary motor, primary motor  
227 and primary somatosensory ROIs, this proportion was 78.8%, 73.9%, 80.8%, 87.5% and 64.7%,  
228 respectively (Fig 3A). The omnibus Kruskal-Wallis ANOVA revealed significant differences in  
229 RF<sub>motor</sub> projection strength among ROIs (test statistic = 118.73, df = 5,  $p < 2.2 \times 10^{-16}$ ). FDR-  
230 corrected pairwise comparisons found that each ROI had significantly greater RF<sub>motor</sub> projection  
231 strength than other (non-ROI) cortical areas, and there were significant differences among ROIs  
232 (Table 2). The primary motor area had significantly greater RF<sub>motor</sub> projection strength than all  
233 other ROIs except the secondary motor area, which had significantly greater projection strength  
234 than the medial prefrontal and primary somatosensory areas. The anterior cingulate area was  
235 not significantly different from the secondary motor, medial prefrontal or primary somatosensory  
236 areas. Compared with the pyramids target, projection strength to RF<sub>motor</sub> was significantly  
237 greater overall and within all cortical ROIs except the primary somatosensory cortex, where the  
238 relative projection strengths were equivocal.

239 <<< Insert Figure 2 near here >>>

240 For the pyramids target, 49.9% of cortical injections had projection strengths  $\geq 0.01$ .  
241 Within the anterior cingulate, medial prefrontal, secondary motor, primary motor and primary

242 somatosensory ROIs, this proportion was 42.3%, 26.1%, 80.8%, 91.7% and 73.1%, respectively  
243 (Figs 2 & 3A, Table 2). The omnibus Kruskal-Wallis ANOVA revealed significant differences in  
244 pyramid projection strength among ROIs (test statistic = 148.10,  $df = 5$ ,  $p < 2.2 \times 10^{-16}$ ). FDR-  
245 corrected pairwise comparisons found that the motor and somatosensory areas had significantly  
246 greater pyramid projection strength than other (non-ROI) cortical areas, but the anterior  
247 cingulate and medial prefrontal areas did not (Table 2). The primary motor area had significantly  
248 greater pyramid projection strength than all other ROIs except the primary somatosensory area,  
249 which had significantly greater projection strength than the anterior cingulate and medial  
250 prefrontal areas. The secondary motor area was not significantly different from the primary  
251 somatosensory area and also had significantly greater projection strength than the anterior  
252 cingulate and medial prefrontal areas.

253 <<< Insert Figure 3 near here >>>

254 Ipsilateral projection strength was significantly greater than contralateral for both  $RF_{\text{motor}}$   
255 and the pyramids (Fig 3B, Table 2). Compared with the pyramids target, projection strength to  
256  $RF_{\text{motor}}$  was significantly greater for both the ipsilateral and contralateral projections. However,  
257  $RF_{\text{motor}}$  projection strength was significantly less lateralized, with a median laterality index of  
258 20.2, versus 86.8 for the pyramids (Fig 3C, Table 2).

259 <<< Insert Table 2 near here >>>

260 In the exploratory CRP versus CST trajectory comparison analysis, we tested how  
261 strongly the projection density at each voxel was associated with  $RF_{\text{motor}}$  (CRP) versus pyramids  
262 (CST) projection strength, while controlling for total projection density. A large cluster of voxels  
263 with significantly greater  $RF_{\text{motor}}$  association spanned all right cortical ROIs and was anterior to  
264 the main cluster of greater pyramids association, which included the medial parts of the primary  
265 motor and primary somatosensory areas (Fig 4 row 1). In the subcortex, the cluster of greater  
266  $RF_{\text{motor}}$  association followed a trajectory towards the brainstem through the internal capsule that  
267 was anterior, ventral and medial to the cluster of greater pyramids association (Fig 4 rows 2-6).

268 In the ventral diencephalon and rostral midbrain, the two trajectories crossed and the cluster of  
269 greater RF<sub>motor</sub> association became dorsal to the cluster of greater pyramids association. The  
270 cluster of greater RF<sub>motor</sub> association then expanded to fill most of the dorsal pons and medulla  
271 bilaterally, with multiple areas of apparent decussation, especially in the pons. Meanwhile, the  
272 cluster of greater pyramids association followed the compact trajectory of the pyramids in the  
273 ventral brainstem and remained primarily ipsilateral before most of the cluster began  
274 decussating in the most caudal slices of the medulla.

275 <<< Insert Figure 4 near here >>>

276

## 277 **DISCUSSION**

278 This study used cortex-wide anterograde axonal tracing data to map the mouse CRP, in  
279 comparison with the CST, with an emphasis on cortical inputs and laterality. As expected, the  
280 motor cortex provided strong CRP and CST projections. The CRP received its strongest inputs  
281 from the primary and secondary motor areas while the CST received its strongest inputs from  
282 the primary motor and primary somatosensory areas. Unlike the CST, the CRP also had strong  
283 projections originating from the anterior cingulate and medial prefrontal areas. Both tracts had  
284 significantly stronger ipsilateral vs. contralateral projections (above the level of the pyramidal  
285 decussation), but the CRP was less lateralized, with a greater proportion of bilateral projections.  
286 The CRP had greater projection strength than the CST for all ROIs except the primary  
287 somatosensory cortex, and for both ipsilateral and contralateral projections.

288 Overall, these results indicate that the CRP is a widely distributed, bilaterally projecting  
289 tract in the mouse with more diverse cortical inputs than the CST and thus greater likelihood of  
290 partial sparing after brain injury. This is consistent with a recent study that found loss of  
291 ipsilesional CST projection strength and upregulation of the ipsilesional CRP, which was  
292 correlated with motor recovery after frontoparietal lesions in primates.(Darling et al., 2018) It is  
293 also consistent with another recent study showing residual capacity for ipsilesional CRP

294 upregulation following intracerebral hemorrhage in rats.(Ishida et al., 2019) In addition, the  
295 bilateral projection strength of the CRP is reinforced by studies in mice(Takase et al., 2017) and  
296 humans(Jang et al., 2013) reporting upregulation of the contralateral CRP after stroke, which  
297 was correlated with motor recovery.

298         The current findings appear to diminish long-standing uncertainty from classical tract  
299 tracer studies about whether there are CRP projections emanating from the anterior cingulate  
300 and medial prefrontal cortices.(Berrevoets and Kuypers, 1975; Keizer et al., 1984; Keizer et al.,  
301 1989; Newman et al., 1989; Rho et al., 1997; Rossi and Brodal, 1956) From our large, cortex-  
302 wide analysis of next-generation anterograde tracer experiments, it now seems clear that each  
303 of these projections is relatively strong, at least in the mouse. Many prior animal studies of the  
304 CRP have focused solely on its strongest origins in the motor cortex.(Asboth et al., 2018;  
305 Darling et al., 2018; Fisher et al., 2021; Fregosi et al., 2017; He and Wu, 1985; Ishida et al.,  
306 2019; Jinnai, 1984; Kably and Drew, 1998; Kably and Drew, 1998; Lamas et al., 1994;  
307 Matsuyama et al., 2004; Pilyavsky, 1975; Takase et al., 2017) Thus, future studies are needed  
308 to determine the extent to which these additional portions of the CRP might be capable of  
309 mediating motor recovery after a brain injury.

310         Our findings also raise pressing questions about the degree to which CRP projections  
311 from the anterior cingulate and medial prefrontal cortices may have been preserved in humans.  
312 If these projections have been evolutionarily preserved, prior diffusion tractography studies have  
313 vastly underestimated the extent of the CRP. Several of these studies have restricted the  
314 analysis to projections involving either the precentral gyrus(Lindenberg et al., 2010; Schulz et  
315 al., 2017; Zheng and Schlaug, 2015) or secondary motor cortex,(Jang and Seo, 2015; Yeo et  
316 al., 2012; Yeo et al., 2020) possibly because initial attempts to map the human CRP without  
317 limiting the cortical search window have not found anterior cingulate or medial prefrontal  
318 origins.(Soulard et al., 2020; Yeo et al., 2014) However, these studies performed tractography  
319 with low-resolution diffusion-weighted imaging and the simple diffusion tensor model, which is

320 unable to resolve multiple fiber populations within a voxel and thus highly prone to false  
321 negatives (and false positives).(Calamante, 2019) Using a slightly more sophisticated model,  
322 Jang and Seo(Jang and Seo, 2014) identified CRP streamlines originating from the dorsal  
323 prefrontal cortex, but did not search the anterior cingulate cortex or as far anterior as the medial  
324 prefrontal cortex. Thus, it is still possible that CRP bundles originating from the anterior  
325 cingulate and medial prefrontal cortices may have persisted in humans. Assessing this  
326 possibility with higher resolution diffusion-weighted imaging and next generation modeling  
327 methods should be a priority.

328         Given that some prior studies have only studied CRP projections originating from the  
329 secondary motor area,(Jang and Seo, 2015; Yeo et al., 2012; Yeo et al., 2020) another  
330 important finding was that the primary and secondary motor areas had similar CRP projection  
331 strength. Prior tract tracer and invasive neurophysiology studies in animals (including primates)  
332 have also consistently found evidence of robust CRP projections originating from the primary  
333 motor cortex, including many collateral branches of CST axons.(Asboth et al., 2018; Fisher et  
334 al., 2012; Fisher et al., 2021; Fregosi et al., 2017; He and Wu, 1985; Ishida et al., 2019; Jinnai,  
335 1984; Kably and Drew, 1998; Kably and Drew, 1998; Lamas et al., 1994; Matsuyama et al.,  
336 2004) Human CRP tractography studies have identified these primary motor cortex projections  
337 too.(Jang and Seo, 2014; Lindenberg et al., 2010; Schulz et al., 2017; Zheng and Schlaug,  
338 2015) This indicates that primary motor cortex stimulation or recording likely does not  
339 specifically target the CST as often presumed.<sup>e.g.</sup>(Barthélemy et al., 2011; Capaday et al., 1999;  
340 Chieffo et al., 2016; Jayaram et al., 2012) It also suggests that projections from the primary  
341 motor area should not necessarily be omitted during CRP tractography.

342         Our broad quantification of CRP laterality (Fig 3B & 3C; Table 2) is consistent with the  
343 more focal results from prior studies.(Fisher et al., 2021; Kably and Drew, 1998; Rho et al.,  
344 1997) For example, Kably and Drew(Kably and Drew, 1998) used microstimulation to measure  
345 the laterality of 157 CRP neurons originating from primary or secondary motor areas in the cat

346 and found that 49% were ipsilateral, 35% were bilateral and 16% were contralateral. Using  
347 retrograde axonal tracing in the cat, Rho et al(Rho et al., 1997) found that the percentage of  
348 ipsilateral CRP projections varied from 46.0% to 72.9% across different RF<sub>motor</sub> nuclei. In a  
349 recent microstimulation study among primates, Fisher et al(Fisher et al., 2021) found bilateral  
350 CRP projections to 20/36 (56%) RF<sub>motor</sub> neurons with inputs from the primary motor cortex and  
351 30/36 (83%) RF<sub>motor</sub> neurons with inputs from the secondary motor cortex. The current analysis  
352 extended these findings by showing the distribution of CRP laterality across cortical injection  
353 sites (with high proportions of both ipsilateral and bilateral projection strength) and by  
354 quantitatively confirming that the CRP is significantly less lateralized than the CST.

355 In our exploratory voxel-wise analysis testing projection density associations with RF<sub>motor</sub>  
356 (CRP) versus pyramids (CST) projection strength, the main statistically significant clusters  
357 followed paths consistent with plausible CRP trajectories and known CST trajectories (Fig 4). If  
358 these statistical results for the CRP are consistent with actual axonal trajectories, it would  
359 indicate that the CRP runs anterior, medial and ventral to the CST in the subcortical white  
360 matter then moves dorsal to the CST in the ventral diencephalon and rostral midbrain.  
361 Interestingly, this is consistent with results from preliminary subcortical CRP mapping with  
362 diffusion tractography in humans.(Jang and Seo, 2015) Our results also suggest that the CRP  
363 projects bilaterally throughout the dorsal pons and medulla, with multiple decussation points,  
364 especially in the pons.

365 However, other significant association clusters did not match plausible CRP or CST  
366 trajectories. The majority of these were in cerebral commissures and contralateral cerebral gray  
367 matter regions that were homotopic with ipsilateral clusters and did not project to the brainstem.  
368 Thus, we suspect that these clusters were due to confounding from commissural projections  
369 that happened to originate near CRP and CST projection neurons, or as collateral branches of  
370 CRP or CST axons. When interpreting this analysis, another key consideration is that it was a



371 contrast between RF<sub>motor</sub> and pyramids projection associations and thus it could not find areas of  
372 CRP and CST overlap.

373

### 374 **Limitations**

375 An important limitation to this study is that there was incomplete coverage of some  
376 cortical subregions, despite the large number of anterograde injection experiments. There was  
377 also sparser coverage of the primary motor cortex compared with other ROIs. Thus, next-  
378 generation retrograde tracer experiments may be able to provide more granular CRP mapping  
379 in the future. Another possible issue is that we were only able to include injections in the right  
380 isocortex, but there have not been strong indications of interhemispheric CRP differences in  
381 prior studies. The projection strength metric used in this analysis does not differentiate tract  
382 terminations from continuations, so it could be falsely elevated by sparse fibers passing through  
383 RF<sub>motor</sub> or the pyramids without synapsing. Conversely, using transgenic mice and injections at  
384 various cortical depths may have falsely lowered projection strength for some experiments,  
385 resulting in random measurement error. However, this is unlikely to have caused any systematic  
386 error (bias) in the analyses because the CRP and CST results were obtained from the same  
387 injections and there is no reason to suspect systematic differences between ROIs.

388

### 389 **Conclusions**

390 The mouse CRP bilaterally converged on RF<sub>motor</sub> from large portions of the cortex,  
391 including the primary & secondary motor areas, anterior cingulate, primary somatosensory area  
392 and medial prefrontal area, in order of decreasing projection strength. Compared with the CST,  
393 the CRP was less lateralized and had stronger projections from all these cortical regions except  
394 the primary somatosensory cortex. In the subcortex, the CRP appeared to descend anterior,  
395 ventral and medial to the CST before moving dorsal to the CST near the rostral midbrain and  
396 projecting bilaterally throughout the dorsal pons and medulla. These findings theoretically

397 increase the likelihood of partial CRP sparing after brain injury and reinforce the conceptual  
398 basis for contralesional CRP compensation after unilateral damage. This foundational  
399 information can be used to guide future CRP tractography and projection-specific manipulations.  
400 The current study also highlights the value of robust connectomic data generation and  
401 sharing(Oh et al., 2014) for enabling ancillary analyses to accelerate scientific progress.

## **CONFLICT OF INTEREST STATEMENT**

The authors declare no conflicts of interest.

## **AUTHOR CONTRIBUTIONS**

Conceptualization, Resources, Software, Formal analysis, Visualization, Writing - original draft: PB. Methodology, Writing - review and editing: PB, OOA, YL.

## **DATA ACCESSIBILITY STATEMENT**

The data used for this analysis are available from the Allen Mouse Brain Connectivity Atlas (© 2011 Allen Institute for Brain Science <http://connectivity.brain-map.org/>).

## REFERENCES

- Asboth L, Friedli L, Beauparlant J, Martinez-Gonzalez C, Anil S, Rey E, Baud L, Pidpruzhnykova G, Anderson MA, Shkorbatova P, Batti L, Pages S, Kreider J, Schneider BL, Barraud Q, Courtine G. 2018. Cortico-reticulo-spinal circuit reorganization enables functional recovery after severe spinal cord contusion. *Nat Neurosci* 21:576-588.
- Aydogan DB, Jacobs R, Dulawa S, Thompson SL, Francois MC, Toga AW, Dong H, Knowles JA, Shi Y. 2018. When tractography meets tracer injections: a systematic study of trends and variation sources of diffusion-based connectivity. *Brain Struct Funct* 223:2841-2858.
- Azadbakht H, Parkes LM, Haroon HA, Augath M, Logothetis NK, de Crespigny A, D'Arceuil HE, Parker GJ. 2015. Validation of High-Resolution Tractography Against In Vivo Tracing in the Macaque Visual Cortex. *Cereb Cortex* 25:4299-4309.
- Bakker R, Tiesinga PHE, Kotter R. 2015. The scalable brain atlas: Instant web-based access to public brain atlases and related content. *Neuroinformatics (Totowa, N.J.)* 13:353-366.
- Barthélemy D, Grey MJ, Nielsen JB, Bouyer L. 2011. Involvement of the corticospinal tract in the control of human gait. *Prog Brain Res* 192:181.
- Benjamini Y, Hochberg Y. 1995. Controlling the False Discovery Rate: A Practical and Powerful Approach to Multiple Testing. *J R Statist Soc B* 57:289-300.
- Berrevoets C, Kuypers H. 1975. Pericruciate cortical neurons projecting to brain stem reticular formation, dorsal column nuclei and spinal cord in the cat. *Neurosci Lett* 1:257-262.
- Brownstone RM, Chopek JW. 2018. Reticulospinal systems for tuning motor commands. *Frontiers in Neural Circuits* 12:1-10.
- Calamante F. 2019. The Seven Deadly Sins of Measuring Brain Structural Connectivity Using Diffusion MRI Streamlines Fibre-Tracking. *Diagnostics (Basel)* 9:10.3390/diagnostics9030115.
- Capaday C, Lavoie BA, Barbeau H, Schneider C, Bonnard M. 1999. Studies on the Corticospinal Control of Human Walking. I. Responses to Focal Transcranial Magnetic Stimulation of the Motor Cortex. *J Neurophysiol* 81:129-139.
- Chamberlin NL, Du B, de Lacalle S, Saper CB. 1998. Recombinant adeno-associated virus vector: use for transgene expression and anterograde tract tracing in the CNS. *Brain Res* 793:169-175.
- Chieffo R, Comi G, Leocani L. 2016. Noninvasive Neuromodulation in Poststroke Gait Disorders: Rationale, Feasibility, and State of the Art. *Neurorehabilitation and Neural Repair* 30:71-82.
- Darling WG, Ge J, Stilwell-Morecraft KS, Rotella DL, Pizzimenti MA, Morecraft RJ. 2018. Hand motor recovery following extensive frontoparietal cortical injury is accompanied by upregulated corticoreticular projections in monkey. *The Journal of Neuroscience* 38:6323-6339.
- Dawes H, Enzinger C, Johansen-Berg H, Bogdanovic M, Guy C, Collett J, Izadi H, Stagg C, Wade D, Matthews PM. 2008. Walking performance and its recovery in chronic stroke in relation to extent of lesion overlap with the descending motor tract. *Exp Brain Res* 186:325-333.
- Fisher KM, Zaaimi B, Baker SN. 2012. Reticular formation responses to magnetic brain stimulation of primary motor cortex. *J Physiol* 590:4045-4060.
- Fisher KM, Zaaimi B, Edgley SA, Baker SN. 2021. Extensive Cortical Convergence to Primate Reticulospinal Pathways. *J Neurosci* 41:1005-1018.

- Fregosi M, Contestabile A, Hamadjida A, Rouiller EM. 2017. Corticobulbar projections from distinct motor cortical areas to the reticular formation in macaque monkeys. *Eur J Neurosci* 45:1379-1395.
- Gerfen CR, Economo MN, Chandrashekar J. 2018. Long distance projections of cortical pyramidal neurons. *J Neurosci Res* 96:1467-1475.
- Glover IS, Baker SN. 2020. Cortical, Corticospinal, and Reticulospinal Contributions to Strength Training. *J Neurosci* 40:5820-5832.
- Gutierrez CE, Skibbe H, Nakae K, Tsukada H, Lienard J, Watakabe A, Hata J, Reisert M, Woodward A, Yamaguchi Y, Yamamori T, Okano H, Ishii S, Doya K. 2020. Optimization and validation of diffusion MRI-based fiber tracking with neural tracer data as a reference. *Sci Rep* 10:21285-4.
- He X, Wu C. 1985. Connections between pericruciate cortex and the medullary reticulospinal neurons in cat: an electrophysiological study. *Experimental Brain Research* 61:109-116.
- Ishida A, Kobayashi K, Ueda Y, Shimizu T, Tajiri N, Isa T, Hida H. 2019. Dynamic Interaction between Cortico-Brainstem Pathways during Training-Induced Recovery in Stroke Model Rats. *The Journal of Neuroscience* 39:7306-7320.
- Jang SH, Chang CH, Lee J, Kim CS, Seo JP, Yeo SS. 2013. Functional role of the corticoreticular pathway in chronic stroke patients. *Stroke* 44:1099-1104.
- Jang SH, Lee SJ. 2019. Corticoreticular Tract in the Human Brain: A Mini Review. *Front Neurol* 10:1188.
- Jang SH, Seo JP. 2015. The anatomical location of the corticoreticular pathway at the subcortical white matter in the human brain: A diffusion tensor imaging study. *Somatosens Mot Res* 32:106-109.
- Jang SH, Seo JP. 2014. The distribution of the cortical origin of the corticoreticular pathway in the human brain: a diffusion tensor imaging study. *Somatosens Mot Res* 31:204-208.
- Jayaram G, Stagg CJ, Esser P, Kischka U, Stinear J, Johansen-Berg H. 2012. Relationships between functional and structural corticospinal tract integrity and walking post stroke. *Clin Neurophysiol* 123:2422-2428.
- Jinnai K. 1984. Electrophysiological study on the corticoreticular projection neurons of the cat. *Brain Res* 291:145-149.
- Kably B, Drew T. 1998a. Corticoreticular pathways in the cat. I. Projection patterns and collaterization. *J Neurophysiol* 80:389-405.
- Kably B, Drew T. 1998b. Corticoreticular pathways in the cat. II. Discharge activity of neurons in area 4 during voluntary gait modifications. *J Neurophysiol* 80:406-424.
- Keizer K, Keizer K, Kuypers, H. G. J. M., Kuypers, H. G. J. M. 1989. Distribution of corticospinal neurons with collaterals to the lower brain stem reticular formation in monkey (*Macaca fascicularis*). *Experimental Brain Research* 74:311-318.
- Keizer K, Keizer K, Kuypers, H. G. J. M., Kuypers, H. G. J. M. 1984. Distribution of corticospinal neurons with collaterals to lower brain stem reticular formation in cat. *Experimental Brain Research* 54:107-120.
- Lamas JA, Martinez L, Canedo A. 1994. Pericruciate fibres to the red nucleus and to the medial bulbar reticular formation. *Neuroscience* 62:115-124.

- Lindenberg R, Renga V, Zhu L, L, Betzler F, Alsop D, Schlaug G. 2010. Structural integrity of corticospinal motor fibers predicts motor impairment in chronic stroke. *Neurology* 74:280-287.
- Matsuyama K, Drew T. 1997. Organization of the projections from the pericruciate cortex to the pontomedullary brainstem of the cat: a study using the anterograde tracer Phaseolus vulgaris-leucoagglutinin. *J Comp Neurol* 389:617-641.
- Matsuyama K, Mori F, Nakajima K, Drew T, Aoki M, Mori S. 2004. Locomotor role of the corticoreticular-reticulospinal-spinal interneuronal system. *Prog Brain Res* 143:239-249.
- Newman DB, Hilleary SK, Ginsberg CY. 1989. Nuclear terminations of corticoreticular fiber systems in rats. *Brain Behav Evol* 34:223-264.
- Oh SW, Harris JA, Ng L, Winslow B, Cain N, Mihalas S, Wang Q, Lau C, Kuan L, Henry AM, Mortrud MT, Ouellette B, Nguyen TN, Sorensen SA, Slaughterbeck CR, Wakeman W, Li Y, Feng D, Ho A, Nicholas E, Hirokawa KE, Bohn P, Joines KM, Peng H, Hawrylycz MJ, Phillips JW, Hohmann JG, Wahnoutka P, Gerfen CR, Koch C, Bernard A, Dang C, Jones AR, Zeng H. 2014. A mesoscale connectome of the mouse brain. *Nature* 508:207-214.
- Pilyavsky A. 1975. Characteristics of fast and slow corticobulvar fibre projections to reticulospinal neurones. *Brain Res* 85:49-52.
- R Development Core Team. 2004. R: A Language and Environment for Statistical Computing. R Foundation for Statistical Computing, Vienna, Austria.
- Ragan T, Kadiri LR, Venkataraju KU, Bahlmann K, Sutin J, Taranda J, Arganda-Carreras I, Kim Y, Seung HS, Osten P. 2012. Serial two-photon tomography for automated ex vivo mouse brain imaging. *Nat Methods* 9:255-258.
- Rho M, Cabana T, Drew T. 1997. Organization of the projections from the pericruciate cortex to the pontomedullary reticular formation of the cat: A quantitative retrograde tracing study. *Journal of Comparative Neurology* (1911) 388:228-249.
- Riddle CN, Edgley SA, Baker SN. 2009. Direct and indirect connections with upper limb motoneurons from the primate reticulospinal tract. *J Neurosci* 29:4993-4999.
- Rossi G, F, Brodal A. 1956. Corticofugal fibres to the brain-stem reticular formation; an experimental study in the cat. *J Anat* 90:42-62.
- Saleeba C, Dempsey B, Le S, Goodchild A, McMullan S. 2019. A student's guide to neural circuit tracing. *Frontiers in Neuroscience* 13:897.
- Schulz R, Park E, Lee J, Chang WH, Lee A, Kim Y, Hummel FC. 2017. Synergistic but independent: The role of corticospinal and alternate motor fibers for residual motor output after stroke. *NeuroImage Clinical* 15:118-124.
- Shammah-Lagnado SJ, Negrao N, Silva BA, Ricardo JA. 1987. Afferent connections of the nuclei reticularis pontis oralis and caudalis: A horseradish peroxidase study in the rat. *Neuroscience* 20:961-989.
- Smith SM, Nichols TE. 2009. Threshold-free cluster enhancement: Addressing problems of smoothing, threshold dependence and localisation in cluster inference. *NeuroImage (Orlando, Fla.)* 44:83-98.
- Soulard J, Huber C, Baillieul S, Thuriot A, Renard F, Aubert Broche B, Krainik A, Vuillerme N, Jaillard A. 2020. Motor tract integrity predicts walking recovery. *Neurology* :10.1212/WNL.0000000000008755.

- Stinear CM, Barber PA, Smale PR, Coxon JP, Fleming MK, Byblow WD. 2007. Functional potential in chronic stroke patients depends on corticospinal tract integrity. *Brain* 130:170-180.
- Sunkin SM, Ng LL, Bensinger A, Pak TH, Wood M, Dougherty JG, Fields R, Desaki AL, Diep E, Sarno NR, Bernard A, Chen T, Sutram M, Gates SN, Dolbeare TA, Luong LT, Zhang B, Parry SE, Rockett HR, Smith KA, Jones AR, Crook BE, Stumpf K, Teemer CD, Byrnes EJ, Czaplinska A, Laramée AR, Young RC, Chong J, Youngstrom BL, Smith BI, Howell MP, Sodt AJ, Riley ZL, Smith SC, Ayres M, Feng Yuan X, Wohnoutka PE, Hohmann JG, Ng R, Zwingman TA, Liu Y, Puchalski RB, Faber C, Mosqueda NF, Rowland SA, Overly CC, Mortrud MT, Liang AJ, Wong VY, Dong H, Wolkey CK, Boguski MS, Thompson CL, Duncan BJ, Morgan JJ, Stewart NN, Whitlock RM, Estin LK, Orta GJ, Jeung DP, Larsen KD, Lein ES, Desta T, Kidney JM, Schaffnit K, Lau C, Karr PT, Facer BA, Morgan RJ, Eichele G, Shapovalova NV, Kawal R, Datta S, Glattfelder KJ, Kuan CL, Sivilay T, Thaller C, Chi Chin M, Royall JJ, Lake JH, Visel A, Fliss TP, Fischer SR, Halverson KR, Yaylaoglu MB, Hawrylycz MJ, Ao N, Pearson OC, Varnam LR, Johnson RA, Michaels J, Hart MR, Dee NR, Slaughterbeck CR, Brockway KS, Frensley C, Chen L, Chen L, Dang CN. 2006. Genome-wide atlas of gene expression in the adult mouse brain. *Nature (London)* 445:168-176.
- Takase H, Kurihara Y, Yokoyama TA, Kawahara N, Takei K. 2017. LOTUS overexpression accelerates neuronal plasticity after focal brain ischemia in mice. *PLoS One* 12:e0184258.
- Wang Q, Ding SL, Li Y, Royall J, Feng D, Lesnar P, Graddis N, Naeemi M, Facer B, Ho A, Dolbeare T, Blanchard B, Dee N, Wakeman W, Hirokawa KE, Szafer A, Sunkin SM, Oh SW, Bernard A, Phillips JW, Hawrylycz M, Koch C, Zeng H, Harris JA, Ng L. 2020. The Allen Mouse Brain Common Coordinate Framework: A 3D Reference Atlas. *Cell* 181:936-953.e20.
- Winkler AM, Ridgway GR, Webster MA, Smith SM, Nichols TE. 2014. Permutation inference for the general linear model. *Neuroimage* 92:381-397.
- Yeo SS, Chang MC, Kwon YH, Jung YJ, Jang SH. 2012. Corticoreticular pathway in the human brain: diffusion tensor tractography study. *Neurosci Lett* 508:9-12.
- Yeo SS, Jang SH, Park GY, Oh S. 2020. Effects of injuries to descending motor pathways on restoration of gait in patients with pontine hemorrhage. *J Stroke Cerebrovasc Dis* 29:104857.
- Yeo SS, Jang SH, Son SM. 2014. The different maturation of the corticospinal tract and corticoreticular pathway in normal brain development: diffusion tensor imaging study. *Front Hum Neurosci* 8:573.
- Zaaimi B, Edgley SA, Soteropoulos DS, Baker SN. 2012. Changes in descending motor pathway connectivity after corticospinal tract lesion in macaque monkey. *Brain* 135:2277-2289.
- Zaaimi B, Soteropoulos DS, Fisher KM, Riddle CN, Baker SN. 2018. Classification of Neurons in the Primate Reticular Formation and Changes after Recovery from Pyramidal Tract Lesion. *J Neurosci* 38:6190-6206.
- Zheng X, Schlaug G. 2015. Structural white matter changes in descending motor tracts correlate with improvements in motor impairment after undergoing a treatment course of tDCS and physical therapy. *Front Hum Neurosci* 9:229.

## TABLES

| <b>Table 1. Reticular formation motor nuclei involved with limb movement (RF<sub>motor</sub>), which form the origin of the reticulospinal tracts.(Brownstone and Chopek, 2018)</b> |                                                                      |              |
|-------------------------------------------------------------------------------------------------------------------------------------------------------------------------------------|----------------------------------------------------------------------|--------------|
| <b>Names in literature</b><br>(Brownstone and Chopek, 2018)                                                                                                                         | <b>Names in connectivity dataset</b><br>(Oh et al., 2014)            | <b>Index</b> |
| Pontine RF <sub>motor</sub> nuclei                                                                                                                                                  |                                                                      |              |
| Nucleus reticularis pontis oralis (PnO)                                                                                                                                             | Pontine reticular nucleus (PRNr)                                     | 931          |
| Nucleus reticularis pontis caudalis (PnC)                                                                                                                                           | Pontine reticular nucleus, caudal part (PRNc)                        | 913          |
| Ventral tegmental nucleus                                                                                                                                                           | Not available                                                        |              |
| Dorsal tegmental nucleus                                                                                                                                                            | Dorsal tegmental nucleus (DTN)                                       | 908          |
| Lateral tegmental nucleus                                                                                                                                                           | Not available                                                        |              |
| Laterodorsal tegmental nucleus (LDT)                                                                                                                                                | Laterodorsal tegmental nucleus (LDT)                                 | 929          |
| Sublaterodorsal tegmental nucleus (SLDT)                                                                                                                                            | Sublaterodorsal nucleus (SLD)                                        | 934          |
| Ventral nucleus of the medial pontine RF (PnV)                                                                                                                                      | Not available                                                        |              |
| Medullary RF <sub>motor</sub> nuclei                                                                                                                                                |                                                                      |              |
| Gigantocellular reticular nucleus (GRN or Gi), or nucleus reticularis gigantocellularis (NRGc) or gigantocellular tegmental field (FTG)                                             | Gigantocellular reticular nucleus (GRN)                              | 975          |
| Nucleus reticularis magnocellularis (NRMc) or magnocellular tegmental field (FTM) or pars alpha and pars ventral of the GRN (GiA & GiV)                                             | Magnocellular reticular nucleus (MARN)                               | 984          |
| Paragigantocellular nucleus dorsal part (DPGi) and lateral part (LPGi)                                                                                                              | Paragigantocellular reticular nucleus (PGRN), dorsal & lateral parts | 990-992      |
| Intermediate reticular zone (IRt)                                                                                                                                                   | Intermediate reticular nucleus (IRN)                                 | 978          |
| Parvocellular reticular nucleus (PCRt)                                                                                                                                              | Parvicellular reticular nucleus (PARN)                               | 988          |
| Medullary RF dorsal part (MdD) and ventral part (MdV)                                                                                                                               | Medullary reticular nucleus (MDRN), dorsal & ventral parts           | 985-987      |



**Table 2. Projection strength to the brainstem targets by cortical injection site and target laterality**

|                                             | Number of injections | Projection strength to RF <sub>motor</sub> |             |                                         | Projection strength to Pyramids |             |                            | RF <sub>motor</sub> vs. Pyramids P <sub>FDR</sub> * |
|---------------------------------------------|----------------------|--------------------------------------------|-------------|-----------------------------------------|---------------------------------|-------------|----------------------------|-----------------------------------------------------|
|                                             |                      | Median (75%ile)                            | N (%) ≥0.01 |                                         | Median (75%ile)                 | N (%) ≥0.01 |                            |                                                     |
| All eligible experiments, bilateral targets | 607                  | 0.02 (0.19)                                | 339 (55.8)  |                                         | 0.01 (0.06)                     | 303 (49.9)  |                            | <0.001                                              |
| <b>By Cortical Injection Site</b>           |                      |                                            |             | P <sub>FDR</sub> vs. Other <sup>†</sup> |                                 |             | P <sub>FDR</sub> vs. Other |                                                     |
| Anterior cingulate                          | 52                   | 0.10 (0.39)                                | 41 (78.8)   | <0.001 <sup>b,c</sup>                   | 0.01 (0.03)                     | 22 (42.3)   | 0.43 <sup>c</sup>          | <0.001                                              |
| Medial prefrontal                           | 46                   | 0.05 (0.19)                                | 34 (73.9)   | <0.001 <sup>c</sup>                     | 0.00 (0.01)                     | 12 (26.1)   | 0.56 <sup>c</sup>          | <0.001                                              |
| Secondary motor                             | 75                   | 0.17 (0.63)                                | 60 (80.0)   | <0.001 <sup>a,b</sup>                   | 0.06 (0.12)                     | 60 (80.0)   | <0.001 <sup>b</sup>        | <0.001                                              |
| Primary motor                               | 24                   | 0.28 (0.63)                                | 21 (87.5)   | <0.001 <sup>a</sup>                     | 0.16 (0.29)                     | 22 (91.7)   | <0.001 <sup>a</sup>        | 0.02                                                |
| Primary somatosensory                       | 119                  | 0.05 (0.29)                                | 77 (64.7)   | <0.001 <sup>c</sup>                     | 0.08 (0.24)                     | 87 (73.1)   | <0.001 <sup>a,b</sup>      | 0.18                                                |
| Other cortical                              | 291                  | 0.00 (0.03)                                | 106 (36.4)  | reference <sup>d</sup>                  | 0.00 (0.02)                     | 100 (34.4)  | reference <sup>c</sup>     | 0.001                                               |
| <b>By Target Laterality</b>                 |                      |                                            |             | P vs. Ipsilateral                       |                                 |             | P vs. Ipsilateral          |                                                     |
| Contralateral                               | 607                  | 0.01 (0.07)                                | 274 (45.1)  | <0.001                                  | 0.00 (0.00)                     | 59 (9.7)    | <0.001                     | <0.001                                              |
| Ipsilateral                                 | 607                  | 0.01 (0.10)                                | 312 (51.4)  | reference                               | 0.01 (0.06)                     | 278 (45.8)  | reference                  | <0.001                                              |
| Laterality Index <sup>‡</sup>               | 607                  | 20.2 (68.8)                                | N/A         | N/A                                     | 86.8 (99.2)                     | N/A         | N/A                        | <0.001                                              |

Projection strength = volume of tracer-labelled pixels in the target of (RF<sub>motor</sub> or pyramids) divided by injection site volume

\*P-values from Wilcoxon signed rank tests (paired by injection experiment) with false discovery rate (FDR) correction

<sup>†</sup>P-values from Mann-Whitney U tests with FDR correction

<sup>a,b,c,d</sup>Rows without a matching letter have pairwise comparisons with p<sub>FDR</sub><0.05

<sup>‡</sup>Ranges from -100 (completely contralateral) to 100 (completely ipsilateral), where 0 indicates bilateral symmetry

## FIGURES

**Figure 1. Locations of cortical anterograde tracer injections and brainstem targets of interest. Top panel.** Each eligible injection experiment (N=607) is marked with a 0.1 mm diameter black sphere within the translucent brain surface rendering. Cortical regions of interest are outlined on the surface and annotated. In the middle and right images, the left hemi-brain and olfactory bulb have been removed from the surface rendering to better visualize the anterior cingulate and medial prefrontal areas. **Bottom panel.** From left to right, slices are  $x=0.4\text{mm}$ ,  $y=-5.2\text{mm}$  and  $y=-7.3\text{mm}$ . RF<sub>motor</sub>, reticular formation motor nuclei involved with limb movement.

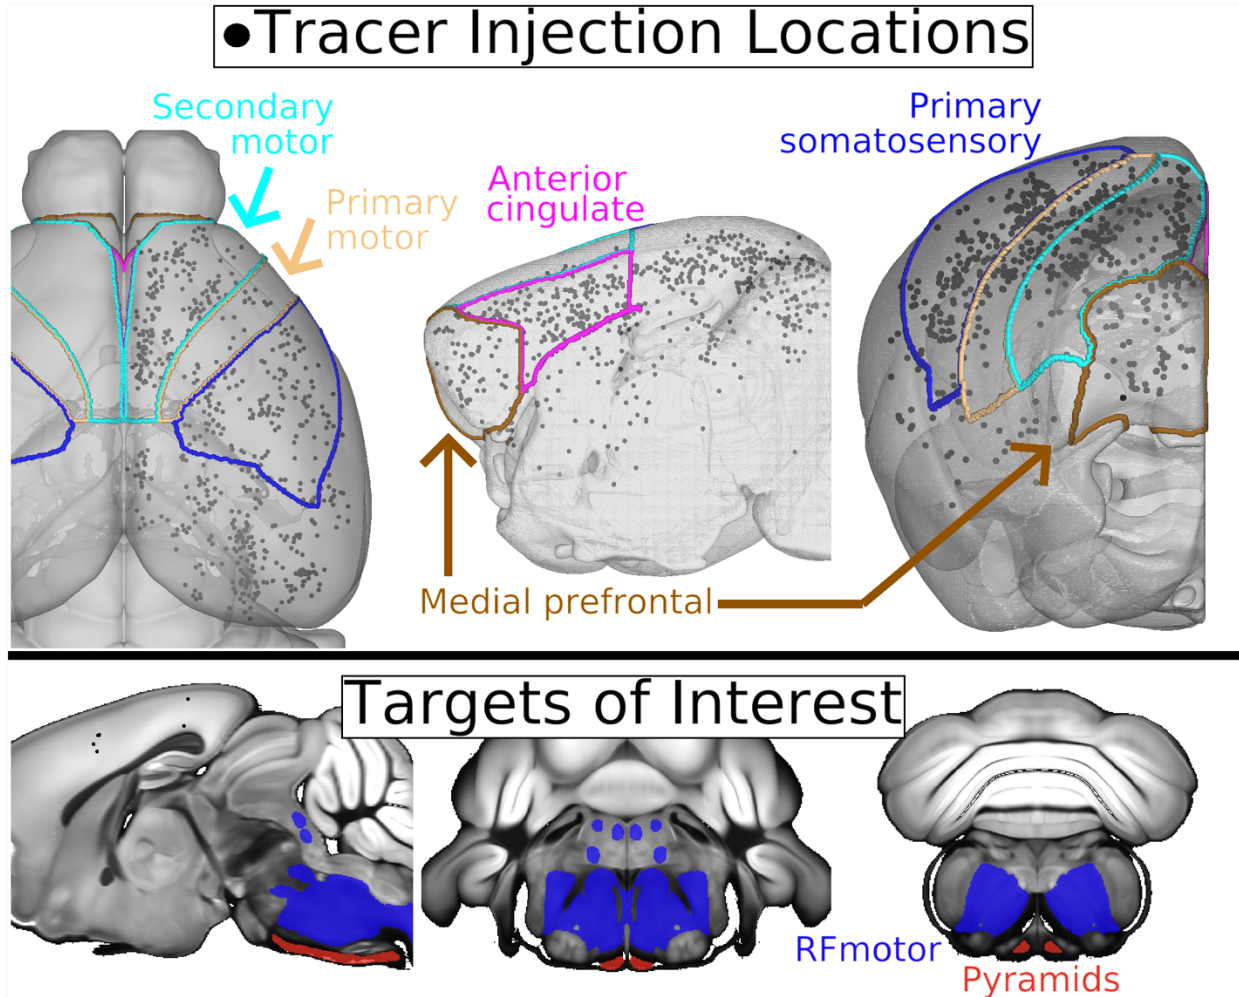

**Figure 2. Anterograde tracer projections from cortical injection sites to the reticular formation motor nuclei (RF<sub>motor</sub>) or medullary pyramids.** Projection strength is the volume of tracer-labelled pixels in the target of interest (RF<sub>motor</sub> or pyramids) divided by the injection site volume. Results from each eligible injection experiment (N=607) are mapped onto the nearest surface vertex with a 0.1 mm radius circle, color-coded with the projection strength from that cortical site to each brainstem target of interest. These results are mapped onto an opaque surface rendering of the right hemi-brain with the olfactory bulb removed for better visualization. Cortical regions of interest are outlined and annotated.

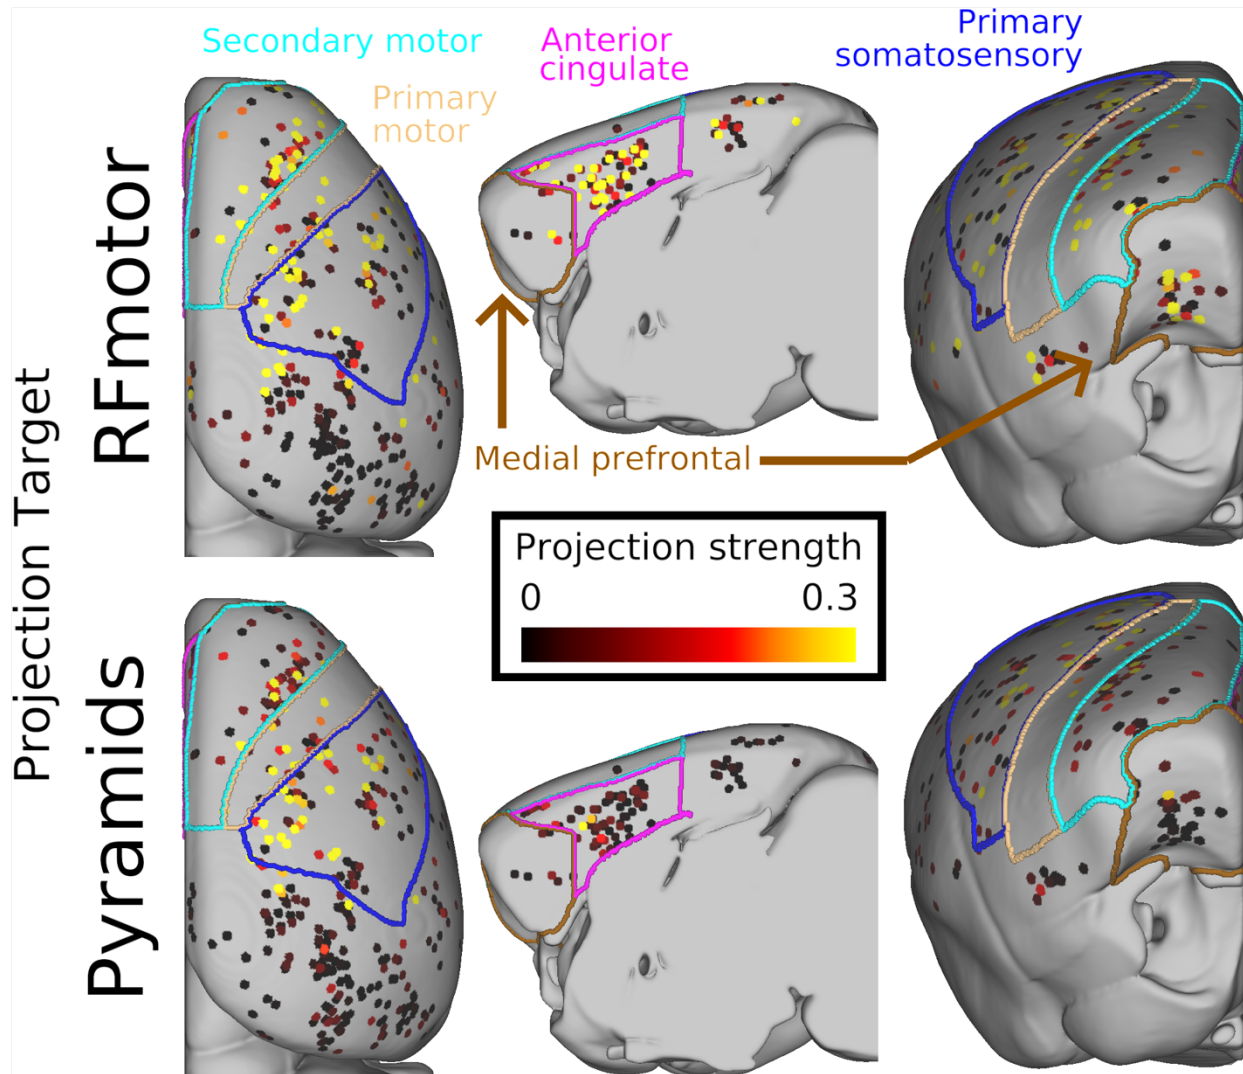

**Figure 3. Projection strength to the brainstem targets by cortical injection site and target laterality.** Projection strength is the volume of tracer-labelled pixels in the target divided by the injection site volume. **Panels A and B.** Each eligible injection experiment (N=607) is shown as a + symbol, with projection strength truncated at 1.0 for visualization. Horizontal bars indicate the 75<sup>th</sup> percentile. **Panel C.** Distribution of tracer laterality across injection experiments for each target. Vertical bars indicate median laterality indices.

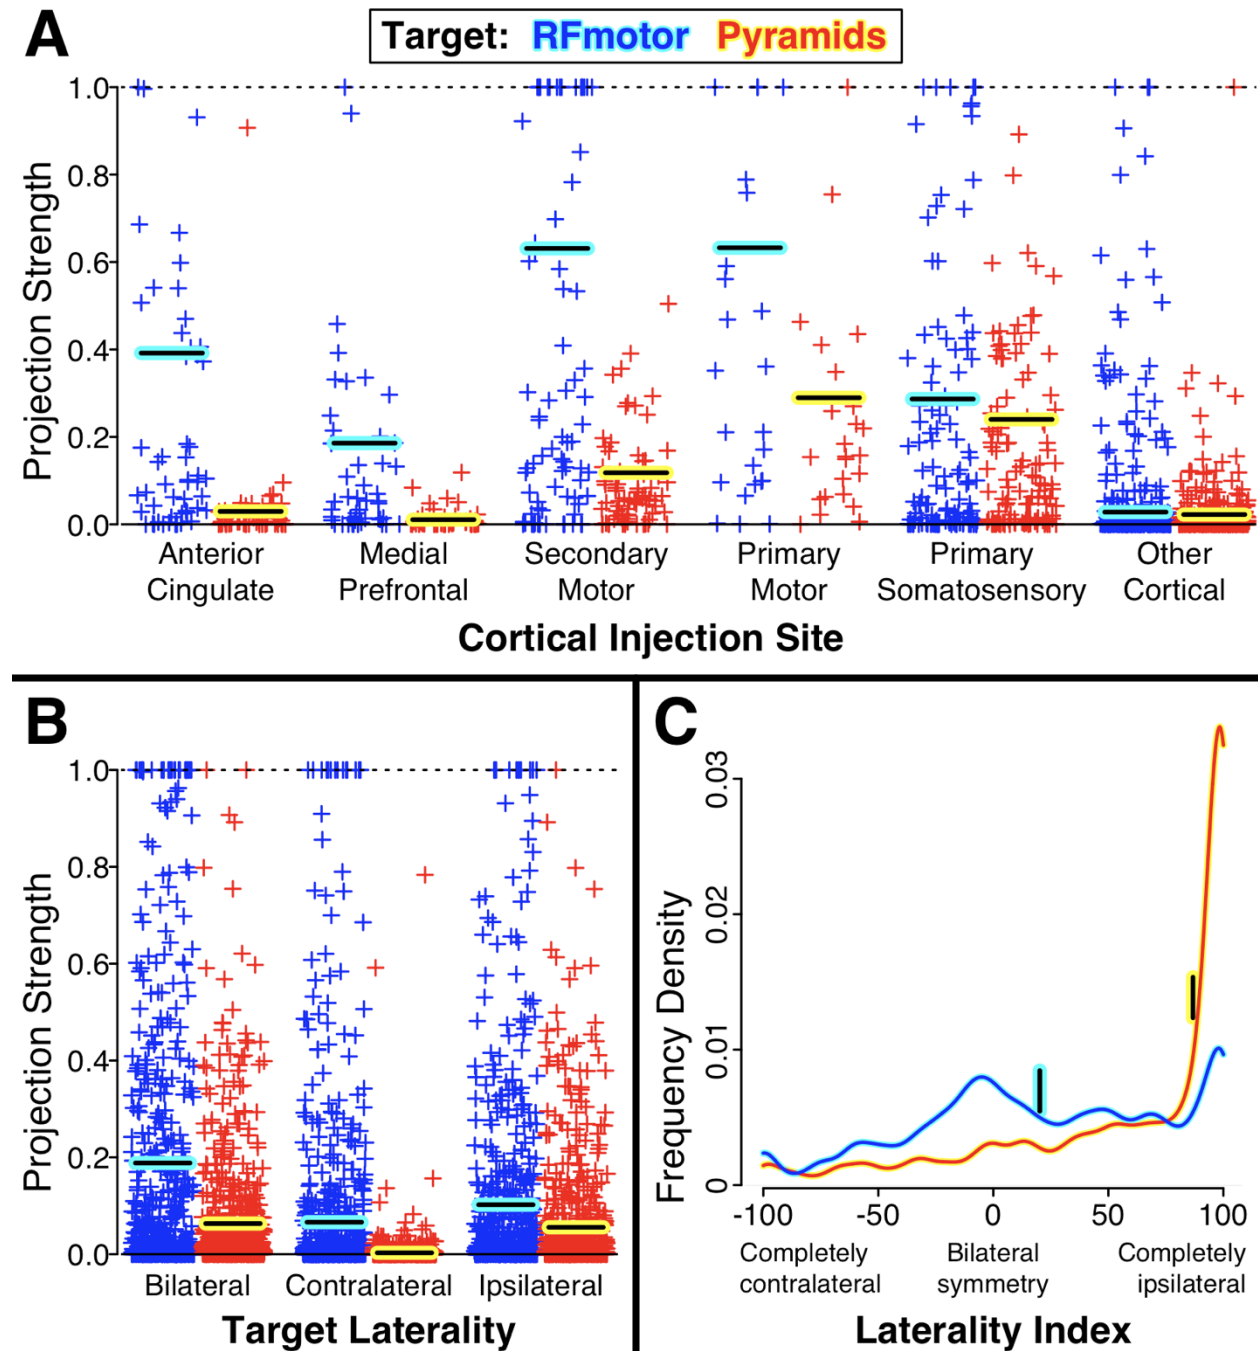

**Figure 4. Exploratory trajectory analysis of the corticoreticular pathway (CRP) versus the corticospinal tract (CST).** Mapped results are T statistics from a general linear model of projection density at each voxel, testing its association with the projection strength to the reticular formation motor nuclei ( $RF_{motor}$ ) versus the medullary pyramids, while controlling for whole-brain projection strength ( $N=607$ ). These results are from non-parametric permutation testing using threshold-free cluster enhancement, and are thresholded at a two-sided, false discovery rate corrected  $p < 0.05$ . Blue T statistics indicate a significantly greater association with  $RF_{motor}$  (CRP) projection strength, while red/yellow T statistics indicate a significantly greater association with pyramids (CST) projection strength. The analysis was done in volume space (rows 2-6) and these volumetric images are in neurologic orientation. For visualization, results were also projected onto the surface model of the right hemibrain without the olfactory bulb (row 1). This surface visualization includes black outlines of the cortical regions of interest shown in other figures.

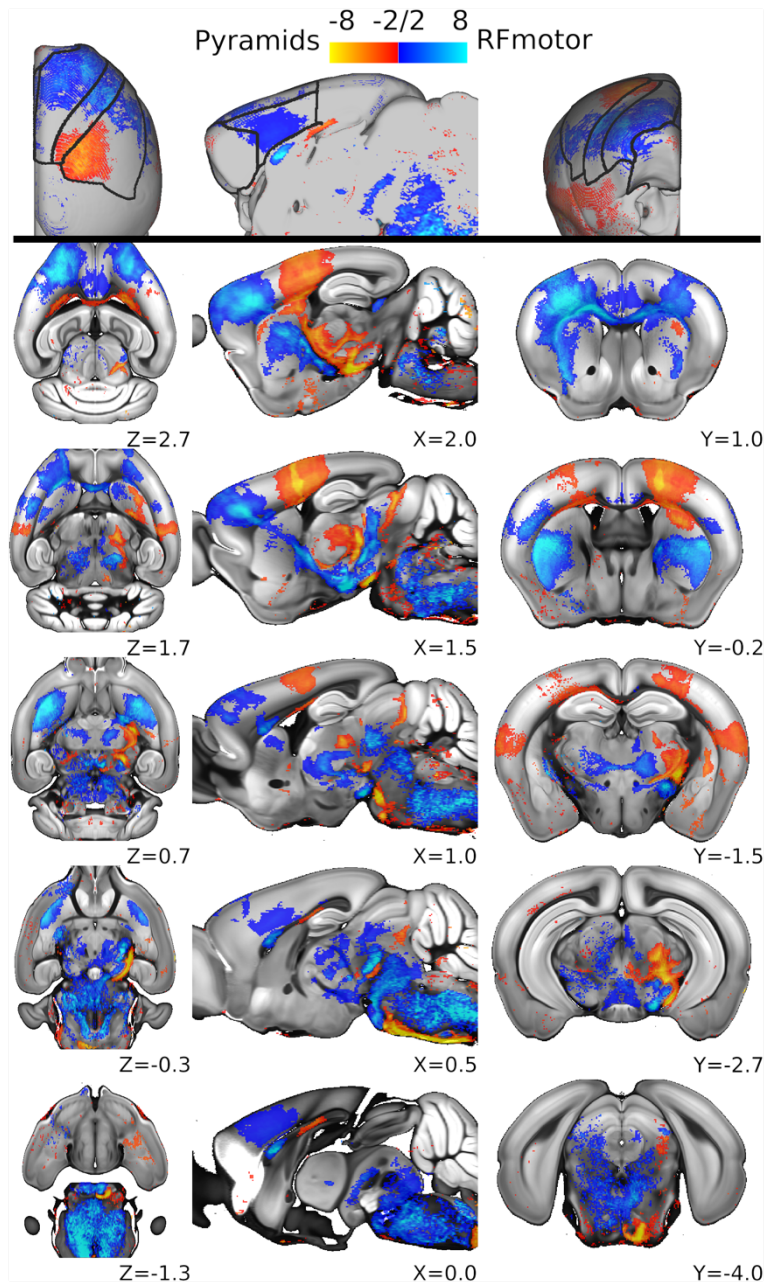

Source: http://biorxiv.org/content/10.1101/2021.06.23.449661v1.full.pdf
